# Supplementary material for: Gene Expression Profiles in Human and Mouse Primary Cells Provide New Insights into the Differential Actions of Vitamin D3 Metabolites
Source: PubMed Central journal article supplement (PMC3792969; doi:10.1371/journal.pone.0075338), 2013-10-08
Supplement: pone.0075338.s003.pdf [file pone.0075338.s003.pdf]

**Table S2.** Enriched gene ontology (GO) categories for exclusively regulated genes in human P29SN stromal cells generated by DAVID.

| <b>Genes regulated only by 10 nM 1<math>\alpha</math>,25(OH)<math>_2</math>D<math>_3</math></b> |                                                                        |                 |
|-------------------------------------------------------------------------------------------------|------------------------------------------------------------------------|-----------------|
| Category                                                                                        | Term                                                                   | <i>p</i> -Value |
| <i>Annotation Cluster 2</i>                                                                     | <i>Enrichment Score: 1.0526103311151749</i>                            |                 |
| GOTERM_BP_FAT                                                                                   | GO:0006259~DNA metabolic process                                       | 0.010           |
| <i>Annotation Cluster 3</i>                                                                     | <i>Enrichment Score: 0.9336547388058266</i>                            |                 |
| SP_PIR_KEYWORDS                                                                                 | ubl conjugation pathway                                                | 0.040           |
| <i>Annotation Cluster 7</i>                                                                     | <i>Enrichment Score: 0.7466633006717093</i>                            |                 |
| GOTERM_MF_FAT                                                                                   | GO:0031420~alkali metal ion binding                                    | 0.021           |
| <i>Annotation Cluster 8</i>                                                                     | <i>Enrichment Score: 0.6832284096027084</i>                            |                 |
| GOTERM_MF_FAT                                                                                   | GO:0043167~ion binding                                                 | 0.016           |
| GOTERM_MF_FAT                                                                                   | GO:0046872~metal ion binding                                           | 0.022           |
| GOTERM_MF_FAT                                                                                   | GO:0043169~cation binding                                              | 0.025           |
| <i>Annotation Cluster 9</i>                                                                     | <i>Enrichment Score: 0.6799962081523407</i>                            |                 |
| GOTERM_BP_FAT                                                                                   | GO:0010605~negative regulation of macromolecule metabolic process      | 0.022           |
| GOTERM_BP_FAT                                                                                   | GO:0010558~negative regulation of macromolecule biosynthetic process   | 0.044           |
| GOTERM_BP_FAT                                                                                   | GO:0031327~negative regulation of cellular biosynthetic process        | 0.049           |
| <b>Genes regulated only by 500 nM 25(OH)D<math>_3</math></b>                                    |                                                                        |                 |
| Category                                                                                        | Term                                                                   | <i>p</i> -Value |
| <i>Annotation Cluster 1</i>                                                                     | <i>Enrichment Score: 2.0177809714626043</i>                            |                 |
| GOTERM_CC_FAT                                                                                   | GO:0070013~intracellular organelle lumen                               | 0.004           |
| GOTERM_CC_FAT                                                                                   | GO:0043233~organelle lumen                                             | 0.005           |
| GOTERM_CC_FAT                                                                                   | GO:0031974~membrane-enclosed lumen                                     | 0.006           |
| GOTERM_CC_FAT                                                                                   | GO:0005654~nucleoplasm                                                 | 0.009           |
| GOTERM_CC_FAT                                                                                   | GO:0031981~nuclear lumen                                               | 0.012           |
| <i>Annotation Cluster 2</i>                                                                     | <i>Enrichment Score: 1.7860151666805686</i>                            |                 |
| GOTERM_BP_FAT                                                                                   | GO:0051252~regulation of RNA metabolic process                         | 0.003           |
| GOTERM_BP_FAT                                                                                   | GO:0006357~regulation of transcription from RNA polymerase II promoter | 0.003           |
| INTERPRO                                                                                        | IPR007087:Zinc finger, C2H2-type                                       | 0.005           |
| INTERPRO                                                                                        | IPR015880:Zinc finger, C2H2-like                                       | 0.006           |
| GOTERM_BP_FAT                                                                                   | GO:0006355~regulation of transcription, DNA-dependent                  | 0.006           |
| GOTERM_MF_FAT                                                                                   | GO:0030528~transcription regulator activity                            | 0.009           |
| SP_PIR_KEYWORDS                                                                                 | nucleus                                                                | 0.009           |
| SMART                                                                                           | SM00355:ZnF_C2H2                                                       | 0.016           |
| SP_PIR_KEYWORDS                                                                                 | transcription regulation                                               | 0.017           |
| SP_PIR_KEYWORDS                                                                                 | dna-binding                                                            | 0.017           |
| SP_PIR_KEYWORDS                                                                                 | Transcription                                                          | 0.020           |

|                             |                                                                                                         |       |
|-----------------------------|---------------------------------------------------------------------------------------------------------|-------|
| GOTERM_BP_FAT               | GO:0045449~regulation of transcription                                                                  | 0.028 |
| GOTERM_BP_FAT               | GO:0006350~transcription                                                                                | 0.028 |
| INTERPRO                    | IPR013087:Zinc finger, C2H2-type/integrase, DNA-binding                                                 | 0.033 |
| <i>Annotation Cluster 3</i> | <i>Enrichment Score: 1.5573464838687392</i>                                                             |       |
| UP_SEQ_FEATURE              | repeat:ANK 3                                                                                            | 0.015 |
| UP_SEQ_FEATURE              | repeat:ANK 1                                                                                            | 0.026 |
| UP_SEQ_FEATURE              | repeat:ANK 2                                                                                            | 0.027 |
| SP_PIR_KEYWORDS             | ank repeat                                                                                              | 0.029 |
| INTERPRO                    | IPR002110:Ankyrin                                                                                       | 0.030 |
| SMART                       | SM00248:ANK                                                                                             | 0.050 |
| <i>Annotation Cluster 4</i> | <i>Enrichment Score: 1.5429055231838762</i>                                                             |       |
| SP_PIR_KEYWORDS             | zinc-finger                                                                                             | 0.003 |
| INTERPRO                    | IPR007087:Zinc finger, C2H2-type                                                                        | 0.005 |
| INTERPRO                    | IPR015880:Zinc finger, C2H2-like                                                                        | 0.006 |
| SP_PIR_KEYWORDS             | metal-binding                                                                                           | 0.013 |
| SMART                       | SM00355:ZnF_C2H2                                                                                        | 0.016 |
| GOTERM_MF_FAT               | GO:0046914~transition metal ion binding                                                                 | 0.020 |
| SP_PIR_KEYWORDS             | zinc                                                                                                    | 0.032 |
| INTERPRO                    | IPR013087:Zinc finger, C2H2-type/integrase, DNA-binding                                                 | 0.033 |
| <i>Annotation Cluster 5</i> | <i>Enrichment Score: 1.3280446589611756</i>                                                             |       |
| GOTERM_BP_FAT               | GO:0006357~regulation of transcription from RNA polymerase II promoter                                  | 0.003 |
| GOTERM_BP_FAT               | GO:0006355~regulation of transcription, DNA-dependent                                                   | 0.006 |
| GOTERM_CC_FAT               | GO:0005654~nucleoplasm                                                                                  | 0.009 |
| GOTERM_MF_FAT               | GO:0030528~transcription regulator activity                                                             | 0.009 |
| GOTERM_MF_FAT               | GO:0016563~transcription activator activity                                                             | 0.019 |
| GOTERM_BP_FAT               | GO:0045941~positive regulation of transcription                                                         | 0.023 |
| GOTERM_MF_FAT               | GO:0003713~transcription coactivator activity                                                           | 0.025 |
| GOTERM_BP_FAT               | GO:0010628~positive regulation of gene expression                                                       | 0.026 |
| GOTERM_BP_FAT               | GO:0045893~positive regulation of transcription, DNA-dependent                                          | 0.032 |
| GOTERM_BP_FAT               | GO:0051254~positive regulation of RNA metabolic process                                                 | 0.034 |
| GOTERM_BP_FAT               | GO:0030518~steroid hormone receptor signaling pathway                                                   | 0.034 |
| GOTERM_BP_FAT               | GO:0045935~positive regulation of nucleobase, nucleoside, nucleotide and nucleic acid metabolic process | 0.037 |
| GOTERM_MF_FAT               | GO:0003712~transcription cofactor activity                                                              | 0.039 |
| GOTERM_BP_FAT               | GO:0051173~positive regulation of nitrogen compound metabolic process                                   | 0.042 |
| GOTERM_BP_FAT               | GO:0010557~positive regulation of macromolecule biosynthetic process                                    | 0.045 |
| <i>Annotation Cluster 6</i> | <i>Enrichment Score: 1.2251280654849863</i>                                                             |       |
| GOTERM_BP_FAT               | GO:0006357~regulation of transcription from RNA polymerase II promoter                                  | 0.003 |
| GOTERM_MF_FAT               | GO:0016564~transcription repressor activity                                                             | 0.006 |

|                             |                                                                                                         |       |
|-----------------------------|---------------------------------------------------------------------------------------------------------|-------|
| GOTERM_MF_FAT               | GO:0030528~transcription regulator activity                                                             | 0.009 |
| SP_PIR_KEYWORDS             | repressor                                                                                               | 0.019 |
| GOTERM_BP_FAT               | GO:0016481~negative regulation of transcription                                                         | 0.028 |
| GOTERM_BP_FAT               | GO:0030902~hindbrain development                                                                        | 0.037 |
| GOTERM_BP_FAT               | GO:0010629~negative regulation of gene expression                                                       | 0.041 |
| GOTERM_BP_FAT               | GO:0045934~negative regulation of nucleobase, nucleoside, nucleotide and nucleic acid metabolic process | 0.043 |
| GOTERM_BP_FAT               | GO:0000122~negative regulation of transcription from RNA polymerase II promoter                         | 0.045 |
| GOTERM_BP_FAT               | GO:0051172~negative regulation of nitrogen compound metabolic process                                   | 0.046 |
| <i>Annotation Cluster 7</i> | <i>Enrichment Score: 1.1399468539342168</i>                                                             |       |
| UP_SEQ_FEATURE              | domain:RRM 1                                                                                            | 0.013 |
| UP_SEQ_FEATURE              | domain:RRM 2                                                                                            | 0.013 |
| <i>Annotation Cluster 8</i> | <i>Enrichment Score: 0.9238015216303497</i>                                                             |       |
| INTERPRO                    | IPR007087:Zinc finger, C2H2-type                                                                        | 0.005 |
| INTERPRO                    | IPR015880:Zinc finger, C2H2-like                                                                        | 0.006 |
| SMART                       | SM00355:ZnF_C2H2                                                                                        | 0.016 |
| INTERPRO                    | IPR013087:Zinc finger, C2H2-type/integrase, DNA-binding                                                 | 0.033 |
| <i>Annotation Cluster 9</i> | <i>Enrichment Score: 0.8145515801861937</i>                                                             |       |
| GOTERM_BP_FAT               | GO:0046394~carboxylic acid biosynthetic process                                                         | 0.043 |
| GOTERM_BP_FAT               | GO:0016053~organic acid biosynthetic process                                                            | 0.043 |

---

**Genes regulated only by 25 nM 24R,25(OH)<sub>2</sub>D<sub>3</sub>**

| Category                    | Term                                        | p-Value |
|-----------------------------|---------------------------------------------|---------|
| <i>Annotation Cluster 1</i> | <i>Enrichment Score: 1.9702677999826337</i> |         |
| SP_PIR_KEYWORDS             | zinc-finger                                 | 0.000   |
| SP_PIR_KEYWORDS             | metal-binding                               | 0.000   |
| SP_PIR_KEYWORDS             | Zinc                                        | 0.002   |
| GOTERM_MF_FAT               | GO:0008270~zinc ion binding                 | 0.023   |
| GOTERM_MF_FAT               | GO:0046914~transition metal ion binding     | 0.036   |
| <i>Annotation Cluster 2</i> | <i>Enrichment Score: 1.7506703521909222</i> |         |
| GOTERM_BP_FAT               | GO:0043414~biopolymer methylation           | 0.009   |
| GOTERM_BP_FAT               | GO:0032259~methylation                      | 0.011   |
| GOTERM_BP_FAT               | GO:0006479~protein amino acid methylation   | 0.024   |
| GOTERM_BP_FAT               | GO:0008213~protein amino acid alkylation    | 0.024   |
| GOTERM_BP_FAT               | GO:0006730~one-carbon metabolic process     | 0.031   |
| <i>Annotation Cluster 3</i> | <i>Enrichment Score: 1.5215974026427899</i> |         |
| SP_PIR_KEYWORDS             | Nucleus                                     | 0.003   |
| SP_PIR_KEYWORDS             | Transcription                               | 0.016   |
| GOTERM_BP_FAT               | GO:0045449~regulation of transcription      | 0.021   |
| SP_PIR_KEYWORDS             | transcription regulation                    | 0.025   |
| GOTERM_BP_FAT               | GO:0006350~transcription                    | 0.027   |

|                             |                                                        |       |
|-----------------------------|--------------------------------------------------------|-------|
| GOTERM_BP_FAT               | GO:0006355~regulation of transcription, DNA-dependent  | 0.039 |
| GOTERM_BP_FAT               | GO:0051252~regulation of RNA metabolic process         | 0.047 |
| <i>Annotation Cluster 4</i> | <i>Enrichment Score: 1.4998334589406268</i>            |       |
| GOTERM_CC_FAT               | GO:0044454~nuclear chromosome part                     | 0.004 |
| GOTERM_CC_FAT               | GO:0000228~nuclear chromosome                          | 0.011 |
| GOTERM_CC_FAT               | GO:0005694~chromosome                                  | 0.012 |
| GOTERM_CC_FAT               | GO:0044427~chromosomal part                            | 0.018 |
| SP_PIR_KEYWORDS             | cell cycle                                             | 0.018 |
| GOTERM_BP_FAT               | GO:0033554~cellular response to stress                 | 0.023 |
| GOTERM_CC_FAT               | GO:0000785~chromatin                                   | 0.023 |
| SP_PIR_KEYWORDS             | dna repair                                             | 0.026 |
| GOTERM_BP_FAT               | GO:0006974~response to DNA damage stimulus             | 0.027 |
| SP_PIR_KEYWORDS             | DNA damage                                             | 0.032 |
| GOTERM_CC_FAT               | GO:0000793~condensed chromosome                        | 0.032 |
| GOTERM_CC_FAT               | GO:0000790~nuclear chromatin                           | 0.035 |
| GOTERM_MF_FAT               | GO:0003684~damaged DNA binding                         | 0.047 |
| GOTERM_BP_FAT               | GO:0007049~cell cycle                                  | 0.048 |
| <i>Annotation Cluster 5</i> | <i>Enrichment Score: 1.4860327874110117</i>            |       |
| INTERPRO                    | IPR008271:Serine/threonine protein kinase, active site | 0.001 |
| INTERPRO                    | IPR002290:Serine/threonine protein kinase              | 0.004 |
| INTERPRO                    | IPR017442:Serine/threonine protein kinase-related      | 0.005 |
| UP_SEQ_FEATURE              | active site:Proton acceptor                            | 0.005 |
| UP_SEQ_FEATURE              | domain:Protein kinase                                  | 0.006 |
| SP_PIR_KEYWORDS             | serine/threonine-protein kinase                        | 0.007 |
| INTERPRO                    | IPR000719:Protein kinase, core                         | 0.007 |
| GOTERM_MF_FAT               | GO:0004674~protein serine/threonine kinase activity    | 0.010 |
| SMART                       | SM00220:S_TKc                                          | 0.010 |
| UP_SEQ_FEATURE              | nucleotide phosphate-binding region:ATP                | 0.011 |
| SP_PIR_KEYWORDS             | transferase                                            | 0.015 |
| GOTERM_BP_FAT               | GO:0006793~phosphorus metabolic process                | 0.015 |
| GOTERM_BP_FAT               | GO:0006796~phosphate metabolic process                 | 0.015 |
| INTERPRO                    | IPR017441:Protein kinase, ATP binding site             | 0.018 |
| GOTERM_BP_FAT               | GO:0006468~protein amino acid phosphorylation          | 0.021 |
| SP_PIR_KEYWORDS             | atp-binding                                            | 0.022 |
| GOTERM_MF_FAT               | GO:0004672~protein kinase activity                     | 0.024 |
| SP_PIR_KEYWORDS             | nucleotide-binding                                     | 0.035 |
| UP_SEQ_FEATURE              | binding site:ATP                                       | 0.040 |
| SP_PIR_KEYWORDS             | serine/threonine-specific protein kinase               | 0.048 |
| <i>Annotation Cluster 6</i> | <i>Enrichment Score: 1.4065466647064622</i>            |       |
| INTERPRO                    | IPR019786:Zinc finger, PHD-type, conserved site        | 0.002 |
| UP_SEQ_FEATURE              | zinc finger region:PHD-type 1                          | 0.016 |
| INTERPRO                    | IPR001965:Zinc finger, PHD-type                        | 0.016 |
| SMART                       | SM00249:PHD                                            | 0.026 |

|                              |                                                       |       |
|------------------------------|-------------------------------------------------------|-------|
| GOTERM_BP_FAT                | GO:0051276~chromosome organization                    | 0.029 |
| SP_PIR_KEYWORDS              | chromatin regulator                                   | 0.036 |
| SP_PIR_KEYWORDS              | repressor                                             | 0.042 |
| <i>Annotation Cluster 7</i>  | <i>Enrichment Score: 1.3257604022723697</i>           |       |
| GOTERM_CC_FAT                | GO:0019898~extrinsic to membrane                      | 0.017 |
| UP_SEQ_FEATURE               | metal ion-binding site:Calcium 2; via carbonyl oxygen | 0.022 |
| UP_SEQ_FEATURE               | metal ion-binding site:Calcium 2                      | 0.041 |
| <i>Annotation Cluster 8</i>  | <i>Enrichment Score: 1.289696018519006</i>            |       |
| INTERPRO                     | IPR018029:C2 membrane targeting protein               | 0.025 |
| INTERPRO                     | IPR000008:C2 calcium-dependent membrane targeting     | 0.047 |
| <i>Annotation Cluster 9</i>  | <i>Enrichment Score: 1.235493407917891</i>            |       |
| INTERPRO                     | IPR001841:Zinc finger, RING-type                      | 0.008 |
| SMART                        | SM00184:RING                                          | 0.019 |
| <i>Annotation Cluster 10</i> | <i>Enrichment Score: 1.220128163077948</i>            |       |
| INTERPRO                     | IPR017442:Serine/threonine protein kinase-related     | 0.005 |

---
