# Supplementary material for: Gene Expression Profiles in Human and Mouse Primary Cells Provide New Insights into the Differential Actions of Vitamin D3 Metabolites
Source: PubMed Central journal article supplement (PMC3792969; doi:10.1371/journal.pone.0075338), 2013-10-08
Supplement: pone.0075338.s004.pdf [file pone.0075338.s004.pdf]

**Table S3.** Enriched gene ontology (GO) categories for exclusively regulated genes in mouse *Cyp27b1*<sup>-/-</sup> fibroblasts generated by DAVID.

| <b>Genes regulated only by 10 nM 1<math>\alpha</math>,25(OH)<math>_2</math>D<math>_3</math></b> |                                                         |         |
|-------------------------------------------------------------------------------------------------|---------------------------------------------------------|---------|
| Category                                                                                        | Term                                                    | p-Value |
| <i>Annotation Cluster 1</i>                                                                     | <i>Enrichment Score: 3.5276665078108884</i>             |         |
| GOTERM_BP_FAT                                                                                   | GO:0045597~positive regulation of cell differentiation  | 0.000   |
| GOTERM_BP_FAT                                                                                   | GO:0051094~positive regulation of developmental process | 0.000   |
| GOTERM_BP_FAT                                                                                   | GO:0045596~negative regulation of cell differentiation  | 0.019   |
| <i>Annotation Cluster 2</i>                                                                     | <i>Enrichment Score: 3.160346739696052</i>              |         |
| SP_PIR_KEYWORDS                                                                                 | glycoprotein                                            | 0.000   |
| UP_SEQ_FEATURE                                                                                  | glycosylation site:N-linked (GlcNAc...)                 | 0.000   |
| GOTERM_CC_FAT                                                                                   | GO:0005578~proteinaceous extracellular matrix           | 0.000   |
| GOTERM_CC_FAT                                                                                   | GO:0031012~extracellular matrix                         | 0.000   |
| GOTERM_CC_FAT                                                                                   | GO:0044421~extracellular region part                    | 0.000   |
| SP_PIR_KEYWORDS                                                                                 | signal                                                  | 0.000   |
| SP_PIR_KEYWORDS                                                                                 | disulfide bond                                          | 0.001   |
| UP_SEQ_FEATURE                                                                                  | signal peptide                                          | 0.001   |
| UP_SEQ_FEATURE                                                                                  | disulfide bond                                          | 0.003   |
| SP_PIR_KEYWORDS                                                                                 | Secreted                                                | 0.004   |
| GOTERM_CC_FAT                                                                                   | GO:0044420~extracellular matrix part                    | 0.005   |
| GOTERM_CC_FAT                                                                                   | GO:0005576~extracellular region                         | 0.007   |
| GOTERM_CC_FAT                                                                                   | GO:0005604~basement membrane                            | 0.011   |
| GOTERM_CC_FAT                                                                                   | GO:0005615~extracellular space                          | 0.017   |
| SP_PIR_KEYWORDS                                                                                 | extracellular matrix                                    | 0.037   |
| <i>Annotation Cluster 3</i>                                                                     | <i>Enrichment Score: 3.010135248587642</i>              |         |
| GOTERM_BP_FAT                                                                                   | GO:0007155~cell adhesion                                | 0.000   |
| GOTERM_BP_FAT                                                                                   | GO:0022610~biological adhesion                          | 0.000   |
| SP_PIR_KEYWORDS                                                                                 | cell adhesion                                           | 0.013   |
| <i>Annotation Cluster 4</i>                                                                     | <i>Enrichment Score: 2.949105380780214</i>              |         |
| GOTERM_BP_FAT                                                                                   | GO:0030850~prostate gland development                   | 0.000   |
| GOTERM_BP_FAT                                                                                   | GO:0001655~urogenital system development                | 0.000   |
| GOTERM_BP_FAT                                                                                   | GO:0060429~epithelium development                       | 0.000   |
| GOTERM_BP_FAT                                                                                   | GO:0022612~gland morphogenesis                          | 0.000   |
| GOTERM_BP_FAT                                                                                   | GO:0048732~gland development                            | 0.000   |
| GOTERM_BP_FAT                                                                                   | GO:0002009~morphogenesis of an epithelium               | 0.001   |
| GOTERM_BP_FAT                                                                                   | GO:0048729~tissue morphogenesis                         | 0.002   |
| GOTERM_BP_FAT                                                                                   | GO:0060740~prostate gland epithelium morphogenesis      | 0.003   |
| GOTERM_BP_FAT                                                                                   | GO:0060512~prostate gland morphogenesis                 | 0.004   |
| GOTERM_BP_FAT                                                                                   | GO:0048608~reproductive structure development           | 0.004   |
| GOTERM_BP_FAT                                                                                   | GO:0003006~reproductive developmental process           | 0.034   |
| <i>Annotation Cluster 5</i>                                                                     | <i>Enrichment Score: 2.4817395458018425</i>             |         |
| GOTERM_MF_FAT                                                                                   | GO:0008083~growth factor activity                       | 0.000   |

|                             |                                                                  |       |
|-----------------------------|------------------------------------------------------------------|-------|
| SP_PIR_KEYWORDS             | growth factor                                                    | 0.000 |
| KEGG_PATHWAY                | mmu04060:Cytokine-cytokine receptor interaction                  | 0.003 |
| GOTERM_CC_FAT               | GO:0005615~extracellular space                                   | 0.017 |
| <i>Annotation Cluster 6</i> | <i>Enrichment Score: 2.1471383765536878</i>                      |       |
| GOTERM_MF_FAT               | GO:0008083~growth factor activity                                | 0.000 |
| SP_PIR_KEYWORDS             | mitogen                                                          | 0.000 |
| GOTERM_BP_FAT               | GO:0051781~positive regulation of cell division                  | 0.000 |
| GOTERM_BP_FAT               | GO:0051302~regulation of cell division                           | 0.000 |
| SP_PIR_KEYWORDS             | growth factor                                                    | 0.000 |
| KEGG_PATHWAY                | mmu05211:Renal cell carcinoma                                    | 0.002 |
| INTERPRO                    | IPR000072:Platelet-derived growth factor (PDGF)                  | 0.004 |
| SMART                       | SM00141:PDGF                                                     | 0.007 |
| GOTERM_BP_FAT               | GO:0006928~cell motion                                           | 0.010 |
| GOTERM_BP_FAT               | GO:0016477~cell migration                                        | 0.021 |
| KEGG_PATHWAY                | mmu04510:Focal adhesion                                          | 0.033 |
| GOTERM_BP_FAT               | GO:0048870~cell motility                                         | 0.047 |
| GOTERM_BP_FAT               | GO:0051674~localization of cell                                  | 0.047 |
| <i>Annotation Cluster 7</i> | <i>Enrichment Score: 2.0167470310432103</i>                      |       |
| GOTERM_BP_FAT               | GO:0002053~positive regulation of mesenchymal cell proliferation | 0.002 |
| GOTERM_BP_FAT               | GO:0010464~regulation of mesenchymal cell proliferation          | 0.002 |
| GOTERM_BP_FAT               | GO:0050679~positive regulation of epithelial cell proliferation  | 0.005 |
| GOTERM_BP_FAT               | GO:0009967~positive regulation of signal transduction            | 0.015 |
| GOTERM_BP_FAT               | GO:0050678~regulation of epithelial cell proliferation           | 0.036 |
| <i>Annotation Cluster 8</i> | <i>Enrichment Score: 2.012273926877482</i>                       |       |
| GOTERM_BP_FAT               | GO:0048666~neuron development                                    | 0.000 |
| GOTERM_BP_FAT               | GO:0030182~neuron differentiation                                | 0.000 |
| GOTERM_BP_FAT               | GO:0030030~cell projection organization                          | 0.001 |
| GOTERM_BP_FAT               | GO:0031175~neuron projection development                         | 0.004 |
| GOTERM_BP_FAT               | GO:0032989~cellular component morphogenesis                      | 0.008 |
| GOTERM_BP_FAT               | GO:0048858~cell projection morphogenesis                         | 0.009 |
| GOTERM_BP_FAT               | GO:0000902~cell morphogenesis                                    | 0.010 |
| GOTERM_BP_FAT               | GO:0006928~cell motion                                           | 0.010 |
| GOTERM_BP_FAT               | GO:0000904~cell morphogenesis involved in differentiation        | 0.012 |
| GOTERM_BP_FAT               | GO:0032990~cell part morphogenesis                               | 0.012 |
| GOTERM_BP_FAT               | GO:0021955~central nervous system neuron axonogenesis            | 0.013 |
| GOTERM_BP_FAT               | GO:0048812~neuron projection morphogenesis                       | 0.016 |
| GOTERM_BP_FAT               | GO:0048667~cell morphogenesis involved in neuron differentiation | 0.019 |
| GOTERM_BP_FAT               | GO:0007409~axonogenesis                                          | 0.040 |
| <i>Annotation Cluster 9</i> | <i>Enrichment Score: 1.9787023556258587</i>                      |       |
| UP_SEQ_FEATURE              | domain:EGF-like 9                                                | 0.000 |

|                              |                                                                      |       |
|------------------------------|----------------------------------------------------------------------|-------|
| UP_SEQ_FEATURE               | domain:EGF-like 8                                                    | 0.000 |
| UP_SEQ_FEATURE               | domain:EGF-like 13                                                   | 0.001 |
| UP_SEQ_FEATURE               | domain:EGF-like 10                                                   | 0.001 |
| UP_SEQ_FEATURE               | domain:EGF-like 6                                                    | 0.001 |
| UP_SEQ_FEATURE               | domain:EGF-like 2                                                    | 0.003 |
| UP_SEQ_FEATURE               | domain:EGF-like 7                                                    | 0.003 |
| UP_SEQ_FEATURE               | domain:EGF-like 12                                                   | 0.006 |
| UP_SEQ_FEATURE               | domain:EGF-like 3                                                    | 0.009 |
| UP_SEQ_FEATURE               | domain:EGF-like 15                                                   | 0.009 |
| UP_SEQ_FEATURE               | domain:EGF-like 14                                                   | 0.011 |
| UP_SEQ_FEATURE               | domain:EGF-like 5                                                    | 0.012 |
| INTERPRO                     | IPR006209:EGF                                                        | 0.014 |
| SP_PIR_KEYWORDS              | egf-like domain                                                      | 0.015 |
| INTERPRO                     | IPR000152:EGF-type aspartate/asparagine hydroxylation conserved site | 0.020 |
| INTERPRO                     | IPR013032:EGF-like region, conserved site                            | 0.021 |
| INTERPRO                     | IPR000742:EGF-like, type 3                                           | 0.023 |
| UP_SEQ_FEATURE               | domain:EGF-like 4                                                    | 0.024 |
| INTERPRO                     | IPR006210:EGF-like                                                   | 0.025 |
| <i>Annotation Cluster 10</i> | <i>Enrichment Score: 1.7655756290309987</i>                          |       |
| GOTERM_BP_FAT                | GO:0022612~gland morphogenesis                                       | 0.000 |
| GOTERM_BP_FAT                | GO:0048732~gland development                                         | 0.000 |
| GOTERM_BP_FAT                | GO:0001763~morphogenesis of a branching structure                    | 0.003 |
| GOTERM_BP_FAT                | GO:0030879~mammary gland development                                 | 0.018 |
| GOTERM_BP_FAT                | GO:0048754~branching morphogenesis of a tube                         | 0.023 |
| GOTERM_BP_FAT                | GO:0060603~mammary gland duct morphogenesis                          | 0.036 |

---

**Genes regulated only by 500 nM 25(OH)D<sub>3</sub>**

| Category                    | Term                                        | p-Value |
|-----------------------------|---------------------------------------------|---------|
| <i>Annotation Cluster 1</i> | <i>Enrichment Score: 1.8054593879563023</i> |         |
| GOTERM_BP_FAT               | GO:0006915~apoptosis                        | 0.003   |
| GOTERM_BP_FAT               | GO:0012501~programmed cell death            | 0.003   |
| GOTERM_BP_FAT               | GO:0008219~cell death                       | 0.005   |
| GOTERM_BP_FAT               | GO:0016265~death                            | 0.005   |
| SP_PIR_KEYWORDS             | Apoptosis                                   | 0.006   |
| <i>Annotation Cluster 2</i> | <i>Enrichment Score: 1.6087166995340825</i> |         |
| GOTERM_BP_FAT               | GO:0010876~lipid localization               | 0.009   |
| GOTERM_BP_FAT               | GO:0006869~lipid transport                  | 0.040   |
| SP_PIR_KEYWORDS             | lipid transport                             | 0.043   |
| <i>Annotation Cluster 3</i> | <i>Enrichment Score: 1.589423219748234</i>  |         |
| SP_PIR_KEYWORDS             | glycoprotein                                | 0.010   |
| SP_PIR_KEYWORDS             | disulfide bond                              | 0.013   |
| UP_SEQ_FEATURE              | glycosylation site:N-linked (GlcNAc...)     | 0.020   |

|                              |                                                        |       |
|------------------------------|--------------------------------------------------------|-------|
| SP_PIR_KEYWORDS              | signal                                                 | 0.021 |
| GOTERM_CC_FAT                | GO:0005576~extracellular region                        | 0.035 |
| SP_PIR_KEYWORDS              | Secreted                                               | 0.039 |
| UP_SEQ_FEATURE               | disulfide bond                                         | 0.042 |
| <i>Annotation Cluster 4</i>  | <i>Enrichment Score: 1.2660938408638478</i>            |       |
| GOTERM_MF_FAT                | GO:0008201~heparin binding                             | 0.013 |
| GOTERM_MF_FAT                | GO:0005539~glycosaminoglycan binding                   | 0.030 |
| GOTERM_CC_FAT                | GO:0044421~extracellular region part                   | 0.038 |
| GOTERM_MF_FAT                | GO:0001871~pattern binding                             | 0.041 |
| GOTERM_MF_FAT                | GO:0030247~polysaccharide binding                      | 0.041 |
| <i>Annotation Cluster 5</i>  | <i>Enrichment Score: 1.1640220270630979</i>            |       |
| GOTERM_BP_FAT                | GO:0048514~blood vessel morphogenesis                  | 0.008 |
| GOTERM_BP_FAT                | GO:0001974~blood vessel remodeling                     | 0.008 |
| GOTERM_BP_FAT                | GO:0001568~blood vessel development                    | 0.019 |
| GOTERM_BP_FAT                | GO:0001944~vasculature development                     | 0.021 |
| GOTERM_BP_FAT                | GO:0048771~tissue remodeling                           | 0.036 |
| <i>Annotation Cluster 6</i>  | <i>Enrichment Score: 1.0727238300317519</i>            |       |
| GOTERM_BP_FAT                | GO:0008283~cell proliferation                          | 0.005 |
| <i>Annotation Cluster 7</i>  | <i>Enrichment Score: 1.057856731672389</i>             |       |
| GOTERM_BP_FAT                | GO:0008283~cell proliferation                          | 0.005 |
| GOTERM_BP_FAT                | GO:0048584~positive regulation of response to stimulus | 0.030 |
| <i>Annotation Cluster 9</i>  | <i>Enrichment Score: 0.9412425657474854</i>            |       |
| GOTERM_BP_FAT                | GO:0009611~response to wounding                        | 0.006 |
| <i>Annotation Cluster 10</i> | <i>Enrichment Score: 0.9351872979790068</i>            |       |
| GOTERM_BP_FAT                | GO:0008283~cell proliferation                          | 0.005 |
| GOTERM_BP_FAT                | GO:0040007~growth                                      | 0.034 |

---

**Genes regulated only by 50 nM 24R,25(OH)<sub>2</sub>D<sub>3</sub>**

| Category                    | Term                                        | p-Value |
|-----------------------------|---------------------------------------------|---------|
| <i>Annotation Cluster 2</i> | <i>Enrichment Score: 0.9369333459647183</i> |         |
| GOTERM_MF_FAT               | GO:0046872~metal ion binding                | 0.043   |
| GOTERM_MF_FAT               | GO:0043169~cation binding                   | 0.046   |
| GOTERM_MF_FAT               | GO:0043167~ion binding                      | 0.050   |

---
