# Supplementary material for: Gene Expression Profiles in Human and Mouse Primary Cells Provide New Insights into the Differential Actions of Vitamin D3 Metabolites
Source: PubMed Central journal article supplement (PMC3792969; doi:10.1371/journal.pone.0075338), 2013-10-08
Supplement: pone.0075338.s005.pdf [file pone.0075338.s005.pdf]

**Table S4.** Enriched gene ontology (GO) categories for commonly regulated genes by both  $1\alpha,25(\text{OH})_2\text{D}_3$  and  $25(\text{OH})\text{D}_3$  in mouse *Cyp27b1*<sup>-/-</sup> fibroblasts generated by DAVID.

| <b>Genes regulated by both 10 nM <math>1\alpha,25(\text{OH})_2\text{D}_3</math> and 500 nM <math>25(\text{OH})\text{D}_3</math></b> |                                                                          |                 |
|-------------------------------------------------------------------------------------------------------------------------------------|--------------------------------------------------------------------------|-----------------|
| Category                                                                                                                            | Term                                                                     | <i>p</i> -Value |
| <b>Annotation Cluster 1</b>                                                                                                         | <b>Enrichment Score: 12.950718485029892</b>                              |                 |
| SP_PIR_KEYWORDS                                                                                                                     | glycoprotein                                                             | 0.000           |
| SP_PIR_KEYWORDS                                                                                                                     | signal                                                                   | 0.000           |
| SP_PIR_KEYWORDS                                                                                                                     | disulfide bond                                                           | 0.000           |
| UP_SEQ_FEATURE                                                                                                                      | glycosylation site:N-linked (GlcNAc...)                                  | 0.000           |
| SP_PIR_KEYWORDS                                                                                                                     | Secreted                                                                 | 0.000           |
| UP_SEQ_FEATURE                                                                                                                      | disulfide bond                                                           | 0.000           |
| UP_SEQ_FEATURE                                                                                                                      | signal peptide                                                           | 0.000           |
| GOTERM_CC_FAT                                                                                                                       | GO:0005576~extracellular region                                          | 0.000           |
| <b>Annotation Cluster 2</b>                                                                                                         | <b>Enrichment Score: 3.3579824639576437</b>                              |                 |
| GOTERM_CC_FAT                                                                                                                       | GO:0005578~proteinaceous extracellular matrix                            | 0.000           |
| GOTERM_CC_FAT                                                                                                                       | GO:0031012~extracellular matrix                                          | 0.000           |
| SP_PIR_KEYWORDS                                                                                                                     | collagen degradation                                                     | 0.000           |
| GOTERM_BP_FAT                                                                                                                       | GO:0030574~collagen catabolic process                                    | 0.000           |
| GOTERM_BP_FAT                                                                                                                       | GO:0044243~multicellular organismal catabolic process                    | 0.000           |
| GOTERM_BP_FAT                                                                                                                       | GO:0032963~collagen metabolic process                                    | 0.000           |
| GOTERM_BP_FAT                                                                                                                       | GO:0044259~multicellular organismal macromolecule metabolic process      | 0.000           |
| GOTERM_MF_FAT                                                                                                                       | GO:0004222~metalloendopeptidase activity                                 | 0.000           |
| GOTERM_BP_FAT                                                                                                                       | GO:0044236~multicellular organismal metabolic process                    | 0.000           |
| INTERPRO                                                                                                                            | IPR016293:Peptidase M10A, matrix metallopeotidase                        | 0.000           |
| INTERPRO                                                                                                                            | IPR006025:Peptidase M, neutral zinc metallopeptidases, zinc-binding site | 0.000           |
| INTERPRO                                                                                                                            | IPR002477:Peptidoglycan binding-like                                     | 0.000           |
| PIR_SUPERFAMILY                                                                                                                     | PIRSF001191:Peptidase_M10A_matrix                                        | 0.000           |
| GOTERM_MF_FAT                                                                                                                       | GO:0008237~metallopeptidase activity                                     | 0.000           |
| INTERPRO                                                                                                                            | IPR000585:Hemopexin/matrixin                                             | 0.000           |
| INTERPRO                                                                                                                            | IPR018486:Hemopexin/matrixin, conserved site                             | 0.000           |
| INTERPRO                                                                                                                            | IPR018487:Hemopexin/matrixin, repeat                                     | 0.000           |
| UP_SEQ_FEATURE                                                                                                                      | domain:Hemopexin-like 3                                                  | 0.000           |
| UP_SEQ_FEATURE                                                                                                                      | domain:Hemopexin-like 4                                                  | 0.000           |
| GOTERM_MF_FAT                                                                                                                       | GO:0004175~endopeptidase activity                                        | 0.000           |
| UP_SEQ_FEATURE                                                                                                                      | domain:Hemopexin-like 1                                                  | 0.000           |
| UP_SEQ_FEATURE                                                                                                                      | domain:Hemopexin-like 2                                                  | 0.000           |
| SMART                                                                                                                               | SM00120:HX                                                               | 0.000           |
| SP_PIR_KEYWORDS                                                                                                                     | extracellular matrix                                                     | 0.000           |
| INTERPRO                                                                                                                            | IPR006026:Peptidase, metallopeptidases                                   | 0.000           |
| SMART                                                                                                                               | SM00235:ZnMc                                                             | 0.000           |

|                      |                                                                      |       |
|----------------------|----------------------------------------------------------------------|-------|
| PIR_SUPERFAMILY      | PIRSF001191:matrix metalloproteinase, stromelysin type               | 0.000 |
| INTERPRO             | IPR001818:Peptidase M10A and M12B, matrixin and adamalysin           | 0.001 |
| GOTERM_MF_FAT        | GO:0070011~peptidase activity, acting on L-amino acid peptides       | 0.001 |
| GOTERM_MF_FAT        | GO:0008233~peptidase activity                                        | 0.002 |
| UP_SEQ_FEATURE       | short sequence motif:Cysteine switch                                 | 0.002 |
| SP_PIR_KEYWORDS      | metalloprotease                                                      | 0.002 |
| UP_SEQ_FEATURE       | metal ion-binding site:Calcium 3; via carbonyl oxygen                | 0.003 |
| UP_SEQ_FEATURE       | propeptide:Activation peptide                                        | 0.004 |
| SP_PIR_KEYWORDS      | metalloproteinase                                                    | 0.007 |
| UP_SEQ_FEATURE       | metal ion-binding site:Zinc 2; in inhibited form                     | 0.008 |
| SP_PIR_KEYWORDS      | zymogen                                                              | 0.011 |
| UP_SEQ_FEATURE       | metal ion-binding site:Calcium 2; via carbonyl oxygen                | 0.014 |
| GOTERM_BP_FAT        | GO:0006508~proteolysis                                               | 0.014 |
| UP_SEQ_FEATURE       | metal ion-binding site:Zinc 2; catalytic                             | 0.015 |
| UP_SEQ_FEATURE       | metal ion-binding site:Zinc; catalytic                               | 0.022 |
| UP_SEQ_FEATURE       | metal ion-binding site:Calcium 1                                     | 0.023 |
| UP_SEQ_FEATURE       | metal ion-binding site:Calcium 2                                     | 0.040 |
| SP_PIR_KEYWORDS      | Protease                                                             | 0.045 |
| Annotation Cluster 3 | Enrichment Score: 3.24116791784555                                   |       |
| INTERPRO             | IPR018097:EGF-like calcium-binding, conserved site                   | 0.000 |
| INTERPRO             | IPR006210:EGF-like                                                   | 0.000 |
| INTERPRO             | IPR001881:EGF-like calcium-binding                                   | 0.000 |
| INTERPRO             | IPR000152:EGF-type aspartate/asparagine hydroxylation conserved site | 0.000 |
| INTERPRO             | IPR006209:EGF                                                        | 0.000 |
| SMART                | SM00181:EGF                                                          | 0.000 |
| SMART                | SM00179:EGF_CA                                                       | 0.000 |
| INTERPRO             | IPR013032:EGF-like region, conserved site                            | 0.000 |
| SP_PIR_KEYWORDS      | egf-like domain                                                      | 0.000 |
| INTERPRO             | IPR000742:EGF-like, type 3                                           | 0.000 |
| UP_SEQ_FEATURE       | domain:EGF-like 6                                                    | 0.002 |
| UP_SEQ_FEATURE       | domain:EGF-like 1                                                    | 0.003 |
| UP_SEQ_FEATURE       | domain:EGF-like 2                                                    | 0.004 |
| UP_SEQ_FEATURE       | domain:EGF-like 4                                                    | 0.005 |
| SP_PIR_KEYWORDS      | notch signaling pathway                                              | 0.011 |
| UP_SEQ_FEATURE       | domain:EGF-like 3                                                    | 0.012 |
| UP_SEQ_FEATURE       | domain:EGF-like 5                                                    | 0.016 |
| INTERPRO             | IPR001438:EGF-like, type 2                                           | 0.024 |
| GOTERM_BP_FAT        | GO:0007219~Notch signaling pathway                                   | 0.028 |
| INTERPRO             | IPR013091:EGF calcium-binding                                        | 0.046 |
| Annotation Cluster 4 | Enrichment Score: 2.4497729172410354                                 |       |

|                             |                                                                 |       |
|-----------------------------|-----------------------------------------------------------------|-------|
| GOTERM_BP_FAT               | GO:0008544~epidermis development                                | 0.000 |
| GOTERM_BP_FAT               | GO:0007398~ectoderm development                                 | 0.001 |
| GOTERM_BP_FAT               | GO:0060429~epithelium development                               | 0.002 |
| GOTERM_BP_FAT               | GO:0009913~epidermal cell differentiation                       | 0.003 |
| GOTERM_BP_FAT               | GO:0030855~epithelial cell differentiation                      | 0.017 |
| GOTERM_BP_FAT               | GO:0030216~keratinocyte differentiation                         | 0.020 |
| <b>Annotation Cluster 5</b> | <b>Enrichment Score: 2.058239137874073</b>                      |       |
| INTERPRO                    | IPR000884:Thrombospondin, type 1 repeat                         | 0.000 |
| SMART                       | SM00209:TSP1                                                    | 0.001 |
| <b>Annotation Cluster 6</b> | <b>Enrichment Score: 1.949896685297675</b>                      |       |
| GOTERM_BP_FAT               | GO:0018149~peptide cross-linking                                | 0.001 |
| INTERPRO                    | IPR001102:Transglutaminase, N-terminal                          | 0.004 |
| INTERPRO                    | IPR013808:Transglutaminase, conserved site                      | 0.004 |
| INTERPRO                    | IPR008958:Transglutaminase, C-terminal                          | 0.004 |
| GOTERM_MF_FAT               | GO:0003810~protein-glutamine gamma-glutamyltransferase activity | 0.005 |
| INTERPRO                    | IPR002931:Transglutaminase-like                                 | 0.006 |
| SMART                       | SM00460:TGc                                                     | 0.008 |
| GOTERM_MF_FAT               | GO:0016755~transferase activity, transferring amino-acyl groups | 0.018 |
| UP_SEQ_FEATURE              | metal ion-binding site:Calcium                                  | 0.050 |
| <b>Annotation Cluster 7</b> | <b>Enrichment Score: 1.9182723957765455</b>                     |       |
| SP_PIR_KEYWORDS             | growth factor                                                   | 0.000 |
| GOTERM_MF_FAT               | GO:0008083~growth factor activity                               | 0.002 |
| KEGG_PATHWAY                | mmu04060:Cytokine-cytokine receptor interaction                 | 0.002 |
| GOTERM_CC_FAT               | GO:0005615~extracellular space                                  | 0.003 |
| SP_PIR_KEYWORDS             | cytokine                                                        | 0.020 |
| GOTERM_MF_FAT               | GO:0005125~cytokine activity                                    | 0.023 |
| BIOCARTA                    | m_erythPathway:Erythrocyte Differentiation Pathway              | 0.023 |
| <b>Annotation Cluster 8</b> | <b>Enrichment Score: 1.721763277599938</b>                      |       |
| GOTERM_MF_FAT               | GO:0043167~ion binding                                          | 0.000 |
| GOTERM_MF_FAT               | GO:0046872~metal ion binding                                    | 0.001 |
| GOTERM_MF_FAT               | GO:0043169~cation binding                                       | 0.002 |
| SP_PIR_KEYWORDS             | metal-binding                                                   | 0.007 |
| <b>Annotation Cluster 9</b> | <b>Enrichment Score: 1.6587981525703623</b>                     |       |
| GOTERM_BP_FAT               | GO:0007411~axon guidance                                        | 0.007 |
| GOTERM_BP_FAT               | GO:0000902~cell morphogenesis                                   | 0.013 |
| GOTERM_BP_FAT               | GO:0006928~cell motion                                          | 0.014 |
| GOTERM_BP_FAT               | GO:0007409~axonogenesis                                         | 0.015 |
| GOTERM_BP_FAT               | GO:0000904~cell morphogenesis involved in differentiation       | 0.015 |
| GOTERM_BP_FAT               | GO:0030030~cell projection organization                         | 0.016 |
| GOTERM_BP_FAT               | GO:0031175~neuron projection development                        | 0.017 |
| GOTERM_BP_FAT               | GO:0048812~neuron projection morphogenesis                      | 0.020 |

|                       |                                                                  |       |
|-----------------------|------------------------------------------------------------------|-------|
| GOTERM_BP_FAT         | GO:0048667~cell morphogenesis involved in neuron differentiation | 0.024 |
| GOTERM_BP_FAT         | GO:0032989~cellular component morphogenesis                      | 0.028 |
| GOTERM_BP_FAT         | GO:0048858~cell projection morphogenesis                         | 0.037 |
| GOTERM_BP_FAT         | GO:0032990~cell part morphogenesis                               | 0.045 |
| Annotation Cluster 10 | Enrichment Score: 1.6264123345827333                             |       |
| KEGG_PATHWAY          | mmu04360:Axon guidance                                           | 0.002 |
| INTERPRO              | IPR003659:Plexin/semaphorin/integrin                             | 0.016 |
| SMART                 | SM00423:PSI                                                      | 0.026 |
| INTERPRO              | IPR001627:Semaphorin/CD100 antigen                               | 0.050 |

---
